# Supplementary material
Source: publisher figshare collection journal article supplement (https://gsapubs.figshare.com/ndownloader/files/22744991)
Supplement: Supplementary file 1 [file 22744991]

# The Bend: Origin and Significance by Rex H. Pilger

## *Data Repository: Tables and Appendix*

**Table 1: Reconstruction Pairs, Magnetic Chrons, Parameter Sources**

| <b>Plate or Hotspot-<br/>Plate Pair</b> | <b>Set*</b> | <b>Magnetic Chrons or [Ages, Ma]<br/>(Cande et al., 1995, time scale)</b>      | <b>Parameter Source(s)</b> |
|-----------------------------------------|-------------|--------------------------------------------------------------------------------|----------------------------|
| Eurasian > North<br>American            |             | 5, 6, 13, 21, 24, 25, 31, 33o, 34y                                             | Müller et al. (1997)†      |
| North American ><br>African             | A           | 5y, 6y, 8y, 13y, 18y, 21y, 24y, 25y, 30y,<br>32n2y, 33o, 34y                   | Müller et al. (1999)       |
|                                         | B           | 5, 6, 13, 21, 25, 30, 32, 33y, 33o, 34y                                        | Müller et al. (1997)†      |
| South American ><br>African             | C           | 5y, 6y, 8y, 13y, 18y, 21y, 24y, 25y, 30y,<br>32n2y, 33o, 34y                   | Müller et al. (1999)       |
|                                         | D           | 1o, 2, 2A, 3, 3A, 4, 4A, 5, 5A-5E, 6, 6A-C,<br>7-13, 15-33, 33R, 34y           | Cande and Kent (1988)      |
| African > East                          | E           | 5, 6, 13, 20, 21, 23, 25, 28, 32, 33, 34y                                      | Norton (2000)†             |
| Antarctic                               | F           | 5, 6, 13y, 18, 20, 22, 24, 28y, 31y, 33, 34y                                   | Müller et al. (1997)†      |
| East Antarctic ><br>West Antarctic      |             | 9o (no subsequent motion), 13o, 20o                                            | Cande et al. (2000)        |
| West Antarctic ><br>Pacific             | G‡          | 2Ay, 3Ay, 5o, 6o, 8o, 13o                                                      | Cande and Stock (2004)     |
|                                         | H           | 2Ay, 3Ay, 4Ay, 5A, 5D, 6Cn3, 10y, 13o,<br>20y, 21o, 24o, 27, 31y, 32, 33o, 34y | Norton (2000)†             |
| East Antarctic ><br>Australian          | I‡          | 2Ay, 3Ay, 5o, 6o, 8o, 13o                                                      | Cande and Stock (2004)     |
|                                         | J           | 5, 6, 13y, 18, 20, 24, 31y, 33o, 34y                                           | Müller et al. (1997)†      |
| Pacific > Farallon                      |             | 5, 6, 13                                                                       | Norton (1995)              |

|                                                                                                                                                                                                                                                                                                                                                                                                                                                                                                                                                                                                                                                                                                                                                                                                                                                                                                                                                                                |  |                                                                                                                                      |                                                                                  |
|--------------------------------------------------------------------------------------------------------------------------------------------------------------------------------------------------------------------------------------------------------------------------------------------------------------------------------------------------------------------------------------------------------------------------------------------------------------------------------------------------------------------------------------------------------------------------------------------------------------------------------------------------------------------------------------------------------------------------------------------------------------------------------------------------------------------------------------------------------------------------------------------------------------------------------------------------------------------------------|--|--------------------------------------------------------------------------------------------------------------------------------------|----------------------------------------------------------------------------------|
| Pacific ><br>Vancouver                                                                                                                                                                                                                                                                                                                                                                                                                                                                                                                                                                                                                                                                                                                                                                                                                                                                                                                                                         |  | 18, 21, 25, 30r, 32, 34y                                                                                                             | Norton (1995) combined with<br>Rosa and Molnar (1988)                            |
| Pacific > Nazca                                                                                                                                                                                                                                                                                                                                                                                                                                                                                                                                                                                                                                                                                                                                                                                                                                                                                                                                                                |  | 1o, 2a, 3a, 4a, 5o, 5AA, 5B, 5D, 6C, 7y,<br>10y<br>13, 18, 21, 25, 32, 34y                                                           | Wilder (2003)<br><br>Mayes et al. (1990)                                         |
| Hawaiian hotspot<br>frame > Pacific**                                                                                                                                                                                                                                                                                                                                                                                                                                                                                                                                                                                                                                                                                                                                                                                                                                                                                                                                          |  | [5, 10.83, 21.16, 25, 33.3, 40.22, 43, 43.87,<br>47.86, 53.25, 63.3, 68.68, 78.78]††<br>[25,43,81,90]<br>[2-70], at 2 m.y. intervals | Raymond et al. (2000,<br>corrected)<br>Norton (2000)<br>Harada and Hamano (2000) |
| Pacific > Farallon<br>&<br>Pacific>Vancouver                                                                                                                                                                                                                                                                                                                                                                                                                                                                                                                                                                                                                                                                                                                                                                                                                                                                                                                                   |  | 5, 6, 13<br>18, 21, 25, 30r, 32, 34y                                                                                                 | Norton (1995)<br>Norton (1995) combined with<br>Rosa and Molnar (1988)           |
| Tristan hotspot<br>frame > African                                                                                                                                                                                                                                                                                                                                                                                                                                                                                                                                                                                                                                                                                                                                                                                                                                                                                                                                             |  | 5o, 13y, 18o, 21o, 25y, 31y, 33y, 33o, 34y                                                                                           | Müller et al. (1993)                                                             |
| <p>* If more than one set is listed, preferred source is listed first. Second set is referred to in the Appendix.</p> <p>† Compilation</p> <p>‡ Chrons 18 through 34y for sets G and I from sets H and J, respectively</p> <p>** Reconstruction ages were reassigned and linearly interpolated to modify the age of the Hawaiian-Emperor bend from 43 to 48 Ma. (e.g., Sharp and Clague, 2002). Reconstructions younger than 25 Ma were unmodified. Those from 25 to 43 Ma linearly interpolated to between 25 and 48 Ma. Reconstructions 43 Ma and older were linearly interpolated to between 48 Ma and the oldest reconstruction provided.</p> <p>†† Raymond et al. associated the ages with magnetic chronos, but the published chronos and ages are not completely consistent with the time scales of either Cande and Kent (1992) or Cande and Kent (1995). Therefore the reported ages are used, without correction to the cited (Cande and Kent, 1995) time scale.</p> |  |                                                                                                                                      |                                                                                  |

**Table 2: Plate Circuits**

| <b>Circuit</b> | <b>Plate Pair 1</b>         | <b>Plate Pair 2</b>    | <b>Resulting Plate Pair</b> |
|----------------|-----------------------------|------------------------|-----------------------------|
| 1              | E. Antarctic > W. Antarctic | W. Antarctic > Pacific | E. Antarctic > Pacific      |
| 2              | African > East Antarctic    | E. Antarctic > Pacific | African > Pacific           |
| 3              | North American > African    | African > Pacific      | North American > Pacific    |
| 4              | South American > African    | African > Pacific      | South American > Pacific    |
| 5              | Eurasian > North America    | American > Pacific     | Eurasian > Pacific          |
| 6              | Australian > East Antarctic | E. Antarctic > Pacific | Australian > Pacific        |

**Table 3: Interpolated Reconstruction Parameters**

|                       | Total Rotation    |                  |                 |
|-----------------------|-------------------|------------------|-----------------|
| Age<br>(Ma)           | Longitude<br>(°E) | Latitude<br>(°N) | Angle<br>(°CCW) |
| Eurasia-North America |                   |                  |                 |
| 5                     | -45.906           | -63.528          | 1.111           |
| 10                    | -46.452           | -65.227          | 2.349           |
| 15                    | -45.11            | -67.635          | 3.72            |
| 20                    | -43.128           | -68.935          | 5.073           |
| 25                    | -42.308           | -67.923          | 6.141           |
| 30                    | -42.561           | -66.109          | 6.967           |
| 35                    | -43.352           | -65.909          | 7.831           |
| 40                    | -44.024           | -67.726          | 8.98            |
| 45                    | -43.252           | -68.204          | 10.335          |
| 50                    | -40.527           | -64.511          | 11.735          |
| 55                    | -38.584           | -62.779          | 13.709          |
| 60                    | -37.644           | -64.011          | 15.537          |
| 65                    | -36.76            | -64.57           | 16.511          |
| 70                    | -35.562           | -65.013          | 17.207          |
| 75                    | -33.928           | -65.599          | 18.072          |
| 80                    | -32.092           | -66.225          | 19.099          |
| North America-Africa  |                   |                  |                 |
| 5                     | 45.656            | 79.624           | 1.164           |
| 10                    | 49.921            | 80.059           | 2.354           |
| 15                    | 46.051            | 80.003           | 3.814           |
| 20                    | 34.5              | 79.479           | 5.533           |
| 25                    | 18.717            | 78.182           | 7.194           |
| 30                    | 5.938             | 76.314           | 8.839           |
| 35                    | -0.363            | 75.241           | 10.761          |
| 40                    | -2.205            | 75.29            | 12.941          |
| 45                    | -3.468            | 75.422           | 14.796          |
| 50                    | -3.622            | 76.41            | 16.261          |
| 55                    | -2.017            | 78.449           | 17.502          |
| 60                    | 1.552             | 80.785           | 18.779          |
| 65                    | 4.01              | 82.4             | 20.249          |
| 70                    | -2.698            | 82.259           | 21.931          |
| 75                    | -13.113           | 80.359           | 24.265          |
| 80                    | -18.664           | 78.127           | 27.347          |
| South America-Africa  |                   |                  |                 |
| 5                     | -39.118           | 61.026           | 1.567           |
| 10                    | -38.651           | 59.722           | 3.29            |
| 15                    | -37.898           | 58.702           | 5.32            |
| 20                    | -36.981           | 57.887           | 7.589           |
| 25                    | -35.949           | 57.138           | 9.785           |

|                                 |         |        |        |
|---------------------------------|---------|--------|--------|
| 30                              | -34.755 | 56.669 | 11.937 |
| 35                              | -33.414 | 56.811 | 14.356 |
| 40                              | -32.309 | 57.532 | 16.932 |
| 45                              | -31.843 | 58.474 | 18.839 |
| 50                              | -31.519 | 59.475 | 20.311 |
| 55                              | -31.337 | 60.534 | 21.69  |
| 60                              | -31.916 | 61.803 | 23.1   |
| 65                              | -33.078 | 62.936 | 24.619 |
| 70                              | -33.69  | 63.212 | 26.254 |
| 75                              | -33.869 | 63.166 | 28.286 |
| 80                              | -34.228 | 62.789 | 31.322 |
| East Antarctica-Africa          |         |        |        |
| 5                               | 15.441  | 21.906 | 2.496  |
| 10                              | 14.751  | 23.017 | 4.89   |
| 15                              | 9.025   | 25.781 | 7.017  |
| 20                              | 4.724   | 27.344 | 9.116  |
| 25                              | 9.101   | 25.546 | 11.51  |
| 30                              | 16.589  | 22.743 | 14.471 |
| 35                              | 20.623  | 22.41  | 17.723 |
| 40                              | 19.055  | 23.4   | 20.763 |
| 45                              | 14.381  | 21.09  | 23.976 |
| 50                              | 11.722  | 18.801 | 27.898 |
| 55                              | 11.291  | 17.567 | 32.751 |
| 60                              | 10.364  | 15.849 | 38.834 |
| 65                              | 8.896   | 14.162 | 45.376 |
| 70                              | 7.605   | 13.527 | 50.597 |
| 75                              | 6.424   | 13.764 | 54.203 |
| 80                              | 6.128   | 13.205 | 58.484 |
| East Antarctica-Australia       |         |        |        |
| 5                               | 35.978  | 14.469 | 3.169  |
| 10                              | 34.03   | 15.461 | 6.229  |
| 15                              | 32.801  | 15.85  | 9.227  |
| 20                              | 32.751  | 15.313 | 12.217 |
| 25                              | 33.802  | 13.948 | 15.266 |
| 30                              | 34.301  | 13.176 | 18.373 |
| 35                              | 32.395  | 14.601 | 21.44  |
| 40                              | 29.726  | 16.736 | 23.86  |
| 45                              | 30.583  | 15.902 | 24.483 |
| 50                              | 31.809  | 14.126 | 24.642 |
| 55                              | 31.735  | 12.805 | 25.127 |
| 60                              | 31.876  | 11.32  | 25.529 |
| 65                              | 32.609  | 9.65   | 25.743 |
| 70                              | 33.504  | 8.288  | 25.872 |
| 75                              | 34.308  | 7.334  | 26.034 |
| 80                              | 35.189  | 6.044  | 26.421 |
| East Antarctica-West Antarctica |         |        |        |
| 25                              | 0       | 0      | 0      |

|                         |          |         |        |
|-------------------------|----------|---------|--------|
| 30                      | -17.847  | -18.146 | 0.161  |
| 35                      | -17.847  | -18.146 | 0.924  |
| 40                      | -17.847  | -18.146 | 1.52   |
| 45                      | -17.847  | -18.146 | 1.7    |
| 80                      | -17.847  | -18.146 | 1.7    |
| Pacific-West Antarctica |          |         |        |
| 5                       | -71.746  | 68.452  | 4.714  |
| 10                      | -75.345  | 70.512  | 8.954  |
| 15                      | -71.783  | 72.916  | 13.265 |
| 20                      | -68.252  | 74.303  | 17.142 |
| 25                      | -67.231  | 74.737  | 20.688 |
| 30                      | -67.219  | 74.418  | 24.296 |
| 35                      | -62.882  | 74.481  | 28.485 |
| 40                      | -53.488  | 74.889  | 33.214 |
| 45                      | -49.805  | 74.723  | 36.659 |
| 50                      | -50.977  | 74.212  | 38.652 |
| 55                      | -53.109  | 73.378  | 40.534 |
| 60                      | -55.329  | 72.011  | 43.426 |
| 65                      | -54.917  | 70.202  | 48.072 |
| 70                      | -52.029  | 68.84   | 53.11  |
| 75                      | -53.044  | 67.358  | 55.955 |
| 80                      | -54.501  | 66.01   | 59.076 |
| Pacific-Nazca           |          |         |        |
| 5                       | -89.734  | 59.192  | 6.21   |
| 10                      | -89.009  | 58.671  | 14.282 |
| 15                      | -90.116  | 60.589  | 22.97  |
| 20                      | -90.12   | 62.188  | 31.165 |
| 25                      | -90.667  | 63.047  | 39.663 |
| 30                      | -99.142  | 66.702  | 46.086 |
| 35                      | -104.796 | 70.771  | 51.762 |
| 40                      | -114.033 | 72.991  | 58.064 |
| 45                      | -123.42  | 73.876  | 64.815 |
| 50                      | -132.126 | 75.455  | 70.075 |
| 55                      | -141.029 | 77.653  | 73.14  |
| 60                      | -145.541 | 78.828  | 74.868 |
| 65                      | -145.437 | 79.082  | 76.534 |
| 70                      | -148.515 | 79.313  | 80.102 |
| 75                      | -163.326 | 79.898  | 87.664 |
| 80                      | -172.751 | 79.488  | 93.746 |
| Pacific-Farallon        |          |         |        |
| 5                       | 54.68    | 72.94   | 3.11   |
| 10                      | 55.422   | 72.558  | 6.28   |
| 15                      | 58.106   | 71.221  | 9.22   |
| 20                      | 58.423   | 72.686  | 12.75  |
| 25                      | 52.076   | 78.468  | 18.628 |
| 30                      | 41.041   | 83.324  | 26.743 |
| 35                      | 44.513   | 85.497  | 34.859 |

|                                |          |        |        |
|--------------------------------|----------|--------|--------|
| 40                             | 65.602   | 85.588 | 41.261 |
| 45                             | 72.943   | 85.766 | 46.847 |
| 50                             | 85.395   | 85.362 | 51.649 |
| 55                             | 98.758   | 83.956 | 55.732 |
| 60                             | 104.797  | 82.837 | 59.302 |
| 65                             | 107.255  | 82.354 | 62.322 |
| 70                             | 108.866  | 82.088 | 64.76  |
| 75                             | 110.695  | 81.29  | 68.839 |
| 80                             | 112.294  | 79.835 | 76.13  |
| Pacific-Vancouver              |          |        |        |
| 5                              | 54.734   | 72.829 | 3.106  |
| 10                             | 55.431   | 72.539 | 6.278  |
| 15                             | 58.014   | 71.522 | 9.251  |
| 20                             | 58.449   | 72.602 | 12.738 |
| 25                             | 53.116   | 77.283 | 18.318 |
| 30                             | 44.046   | 82.295 | 26.258 |
| 35                             | 39.865   | 86.342 | 35.446 |
| 40                             | 79.98    | 89.389 | 44.205 |
| 45                             | -153.742 | 88.362 | 51.388 |
| 50                             | -178.609 | 87.488 | 56.69  |
| 55                             | 146.454  | 86.012 | 60.596 |
| 60                             | 135.403  | 84.609 | 64.028 |
| 65                             | 133.429  | 84.021 | 67.086 |
| 70                             | 132.486  | 83.653 | 69.555 |
| 75                             | 129.468  | 82.764 | 73.617 |
| 80                             | 125.765  | 81.292 | 80.903 |
| Pacific-Hawaiian Hotspot Frame |          |        |        |
| 5                              | -75.1    | 56.5   | 4.7    |
| 10                             | -71.459  | 64.393 | 8.642  |
| 15                             | -69.833  | 70.207 | 12.388 |
| 20                             | -68.403  | 70.432 | 16.46  |
| 25                             | -67.56   | 71.2   | 20.49  |
| 30                             | -65.273  | 70.91  | 23.337 |
| 35                             | -62.791  | 69.342 | 25.22  |
| 40                             | -61.741  | 68.039 | 27.285 |
| 45                             | -59.738  | 67.938 | 29.915 |
| 50                             | -61.777  | 65.863 | 31.777 |
| 55                             | -66.166  | 62.177 | 33.566 |
| 60                             | -69.306  | 58.707 | 35.218 |
| 65                             | -71.702  | 55.494 | 37.253 |
| 70                             | -73.568  | 52.546 | 39.37  |
| 75                             | -73.668  | 51.065 | 39.894 |
| 80                             | -77.227  | 46.519 | 45.577 |
| African-Tristan Hotspot Frame  |          |        |        |
| 5                              | -0.641   | 47.218 | 0.71   |
| 10                             | -26.615  | 58.711 | 1.661  |
| 15                             | -42.815  | 57.085 | 2.946  |

2007006

|    |         |        |        |
|----|---------|--------|--------|
| 20 | -44.506 | 51.057 | 4.323  |
| 25 | -44.196 | 45.752 | 5.74   |
| 30 | -43.597 | 41.889 | 7.123  |
| 35 | -42.508 | 39.599 | 8.379  |
| 40 | -41.226 | 37.766 | 9.614  |
| 45 | -40.706 | 34.575 | 11.171 |
| 50 | -41.009 | 31.841 | 12.657 |
| 55 | -41.623 | 30.318 | 13.72  |
| 60 | -41.762 | 29.112 | 14.66  |
| 65 | -41.313 | 27.576 | 15.644 |
| 70 | -40.493 | 25.149 | 16.762 |
| 75 | -39.173 | 20.9   | 18.293 |
| 80 | -39.261 | 18.004 | 20.37  |



## ***Appendix I - Reconstruction Combinations***

### **Technique**

The reconstructions for each plate pair from the sources in Table 1 were converted into pseudovector series as a function of time (using the time scale of Cande and Kent, 1995, for magnetic isochrons); the reconstruction poles were converted to unit vectors and to which the total rotation rate (total rotation angle divide by age of the reconstruction) was applied, producing the pseudovectors. For the present, the instantaneous models of DeMets et al. (1991) and Gripp and Gordon (1991), converted to the Cande and Kent (1995) time scale, were used.

Each pseudovector series was splined as a function of time (using the algorithm of Press et al., 1992), and interpolated at intervals of five m.y. Then the interpolated parameters (converted to quaternion parameters) were combined in sequence to derive reconstructions of the Eurasian, North and South American, and Australian plates relative to the Pacific plate. In addition, the parameters for reconstructions of the Antarctic and Farallon plates relative to the Pacific plate were splined and interpolated. The plate reconstruction circuits were as follows: Eurasian-North American-African-East Antarctic-West Antarctic-Pacific; North American-African-East Antarctic-West Antarctic-Pacific; South American-African-East Antarctic-West Antarctic-Pacific; and Australian-East Antarctic-West Antarctic-Pacific (Table 2). Table 3 lists the resulting calculated parameters for the preferred sources listed in Table 1 for reconstructions 80 Ma and younger.

From the combined reconstruction parameters, loci of motion of the various plates relative to the Pacific plate were calculated from inferred hotspot locations. For mapping purposes linear segments connect the reconstructed points in each locus.

## **Uncertainties**

Published uncertainties for all of the plate pairs in the Eurasian, North American and South American to Pacific circuits do not yet exist. In particular, reconstruction parameters without uncertainties have been published for Eurasia-North America, Africa-East Antarctica (for reconstructions prior to Chron 18), and West Antarctica-Pacific (prior to Chron 18). Since the critical issue is the apparent change in Pacific plate motion relative to the Hawaiian hotspot and the North and South American plates at ~47-48 Ma, the absence of quantitative uncertainties for reconstructions older than Chron 18 (between African-East Antarctica and West Antarctica-Pacific) precludes quantitative evaluation of the calculated changes.

To evaluate the uncertainty in the reconstructions, in the absence of complete quantitative uncertainty information for all of the plate pairs, an alternative procedure was followed. Alternative reconstruction sets were used for each for five plate pairs: North American-African, South American-African, African-East Antarctic, West Antarctic-Pacific, and Australian-East Antarctic (as noted in Table 1). Combinations of these alternative sets produces eight different parameter sets for Eurasian-Pacific, North American-Pacific and South American-Pacific, four sets for Australian-Pacific, and two sets for West Antarctic-Pacific circuits.

Figure A-1 illustrates the various calculated loci from this alternative procedure. For the North and South American plates, in particular, reconstructed motions relative to the

Pacific plate exhibit abrupt bends for all eight calculated loci at ~45 Ma. Similarly, the loci for other plate pairs also preserve similar trends to the preferred reconstructions illustrated in Fig. 3 and 4.

This procedure provides only graphical illustration of the effects of variations in published reconstructions using differing data sets and techniques and is not a substitute for a more complete uncertainty analysis. However the results should provide some degree of qualitative confidence in the interpreted trends in the absence of complete quantitative uncertainties for all of the reconstruction parameters utilized.

***Appendix Figure Caption***

Figure A-1. Graphical model alternative analysis: Reconstructed loci of various plates (and Hawaiian hotspot) relative to Pacific plate, reconstructed at 5 m.y. intervals, anchored at the Hawaii. Black loci are preferred plate reconstructions relative to the adjacent Pacific plate; gray loci are alternates. Spread of loci for each plate-pair provides some insight into the reproducibility of the reconstructions. Table 1 in the data repository indicates the sources used for the plate-to-plate reconstructions. For Hawaiian hotspot-Pacific loci, the alternative models of Harada and Hamano (2000; circles), Norton (2000; squares), and Raymond et al. (2000; diamonds) were used, recalibrated to an age of the bend of 48 Ma. Note that in all cases (especially for the North and South American plates), distinct changes in orientation of motion relative to the Pacific plate are observed near 45 Ma. If a finer interpolation were provided, the changes would be near 47 or 48 Ma. Magnetic isochrons and plate boundaries from Müller et al. (1997).

### ***Supplementary References***

Cande, S. C., LaBrecque, J. L., and Haxby, W. F. (1988) Plate kinematics of the South Atlantic: Chron 34 to present, *Journal of Geophysical Research*, v. 93, p. 13479-13492.

Cande, S. C., and Kent, D. V. (1992) A new geomagnetic time scale for the Late Cretaceous and Cenozoic, *Journal of Geophysical Research*, v. 97, p. 13917-13951.

Cande, S. C., and Kent, D. V. (1995) Revised calibration of the geomagnetic time scale for the Late Cretaceous and Cenozoic, *Journal of Geophysical Research*, v. 100, p. 6093-6095.

Cande, S. C., Raymond, C. A., Stock, J. M., and Haxby, W. F. (1995) Geophysics of the Pitman Fracture Zone and Pacific-Antarctic plate motions during the Cenozoic, *Science*, v. 270, p. 947-953.

Cande, S. C., Stock, J. M., Müller, R. D., and Ishihara, T. (2000) Cenozoic motion between East and West Antarctica, *Nature*, v. 404, p. 145-150.

Cande, S. C., and Stock, J. M. (2004) Pacific-Antarctic-Australia motion and the formation of the Macquarie plate, *Geophysical Journal International*, v. 157, p. 399-414.

Gripp, A. E., Gordon, R. G. (1991) Current plate velocities relative to the hotspots incorporating the NUVEL-1 global plate motion model, *Geophysical Research Letters*, v. 17, p. 1109-1112.

Harada, Y., and Hamano, Y. (2000) Recent progress on the plate motion relative to hotspots, *in* Richards, M. A., Gordon, R. G., and van der Hilst, R. D., editors, *The history and dynamics of global plate motions*, American Geophysical Union Geophysical Monograph 121, p. 327-338.

Mayes, C. L., Lawver, L. A., Sandwell, D. T. (1990) Tectonic history and new isochron chart of the South Pacific, *Journal of Geophysical Research*, v. 95, 8543-8567.

Müller, R. D., Royer, J.-Y., and Lawver, L. A. (1993) Revised plate motions relative to the hotspots from combined Atlantic and Indian Ocean hotspot tracks, *Geology*, v. 21, p. 275-278.

Müller, R.D., Roest, W.R., Royer, J.-Y., Gahagan, L.M., and Sclater, J.G. (1997) Digital isochrons of the world's ocean floor, *Journal of Geophysical Research*, v. 102, p. 3211-3214. Data: [http://www-sdt.univ-brest.fr/~jyroyer/Agegrid/utig\\_report.html](http://www-sdt.univ-brest.fr/~jyroyer/Agegrid/utig_report.html).

Müller, R.D., Royer, J.-Y., Cande, S. C., Roest, W.R., Maschenkov, S. (1999) New constraints on Caribbean plate tectonic evolution, Mann, P., ed., *Sedimentary Basins of the World*, v. 4, Elsevier, Amsterdam, p. 39-55.

Norton, I. O. (1995) Plate motions in the North Pacific: the 43 Ma non-event, *Tectonics*, v. 14, p. 1080-1094.

Norton, I. O. (2000) Global hotspot reference frames and plate motion, *in* Richards, M. A., Gordon, R. G., and van der Hilst, R. D., editors, *The history and dynamics of global plate motions*, American Geophysical Union Geophysical Monograph 121, p. 339-357.

Pilger, R. H. (2003a) *Geokinematics: Prelude to Geodynamics*, Springer-Verlag, Berlin, 338 p.

Press, W. H., Teukolsky, S. A., Vetterling, W. T., and Flannery B. P. (1992) *Numerical Recipes in C: The Art of Scientific Computing*, Second Edition, Cambridge University Press, Cambridge, England, 994 p.

Raymond, C. A., Stock, J. M., and Cande, S. A. (2000) Fast Paleogene motion of the Pacific hotspots from revised global plate circuit constraints, *in* Richards, M. A., Gordon,

R. G., and van der Hilst, R. D., editors, The history and dynamics of global plate motions, American Geophysical Union Geophysical Monograph 121, p. 359-375. Corrected parameters: <http://www.gps.caltech.edu/~jstock/Raymond-et-al.Table1.corr.htm>.

Sharp, W. D., and Clague, D. A. (2002) An Older, Slower Hawaii-Emperor Bend, EOS Transactions of the American Geophysical Union, v. 83, Fall Meeting Supplement, Abstract T61C-04.

Wilder, D. T. (2003), Relative motion history of the Pacific-Nazca (Farallon) plates since 30 million years ago, Masters Thesis (unpublished), University of South Florida, 94 p.

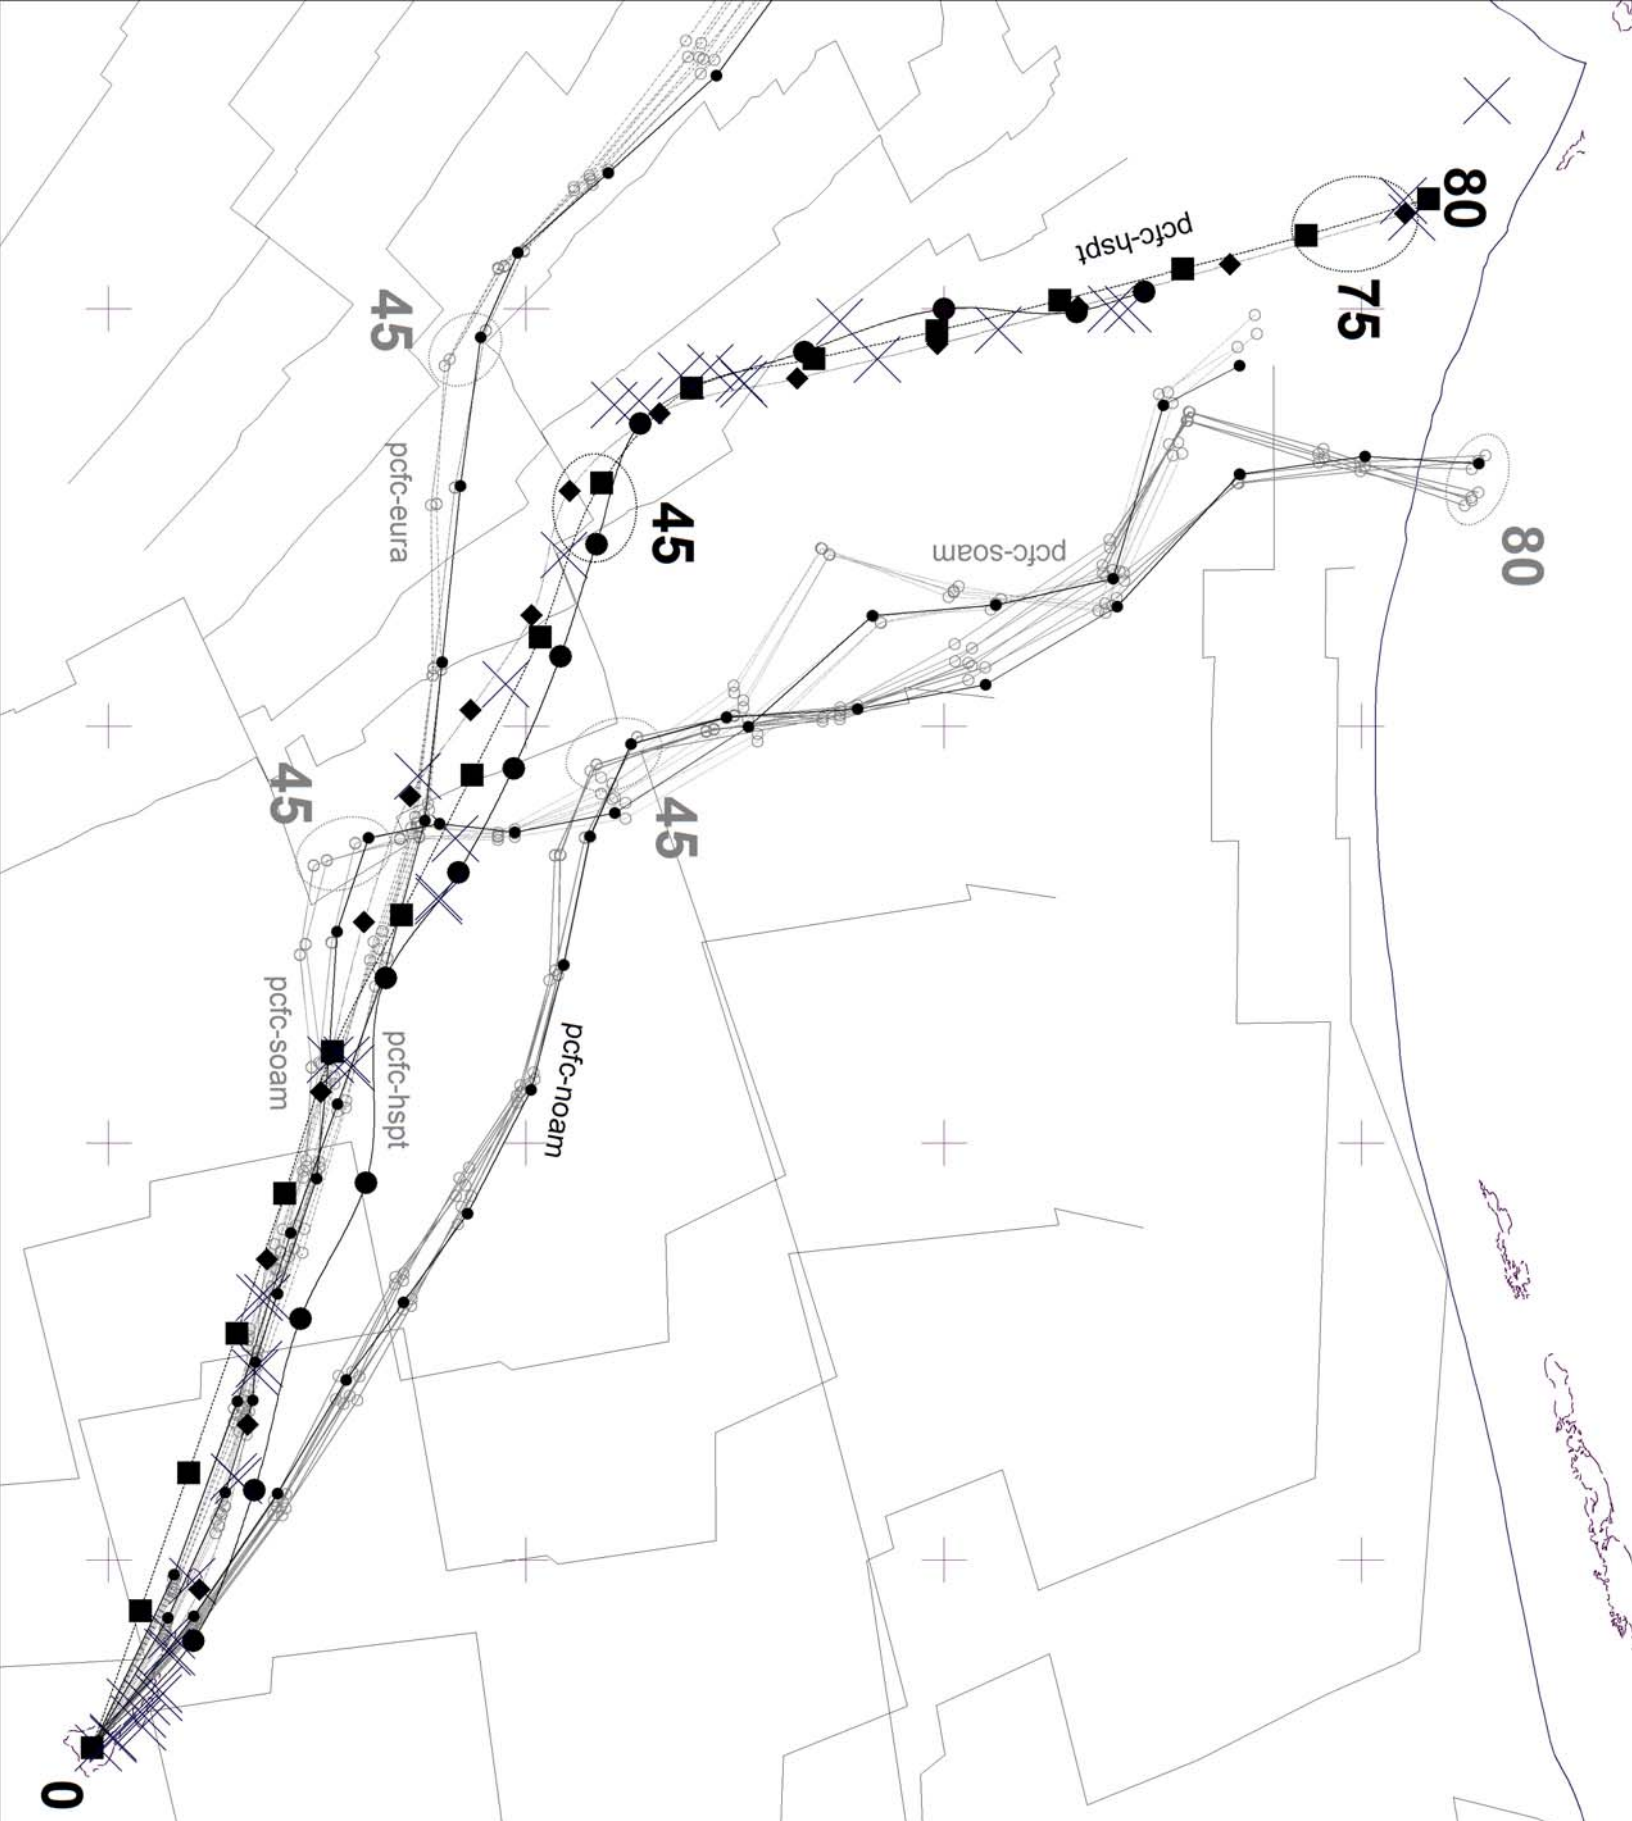



## The Bend: Origin and Significance

*Full Size Figures:*

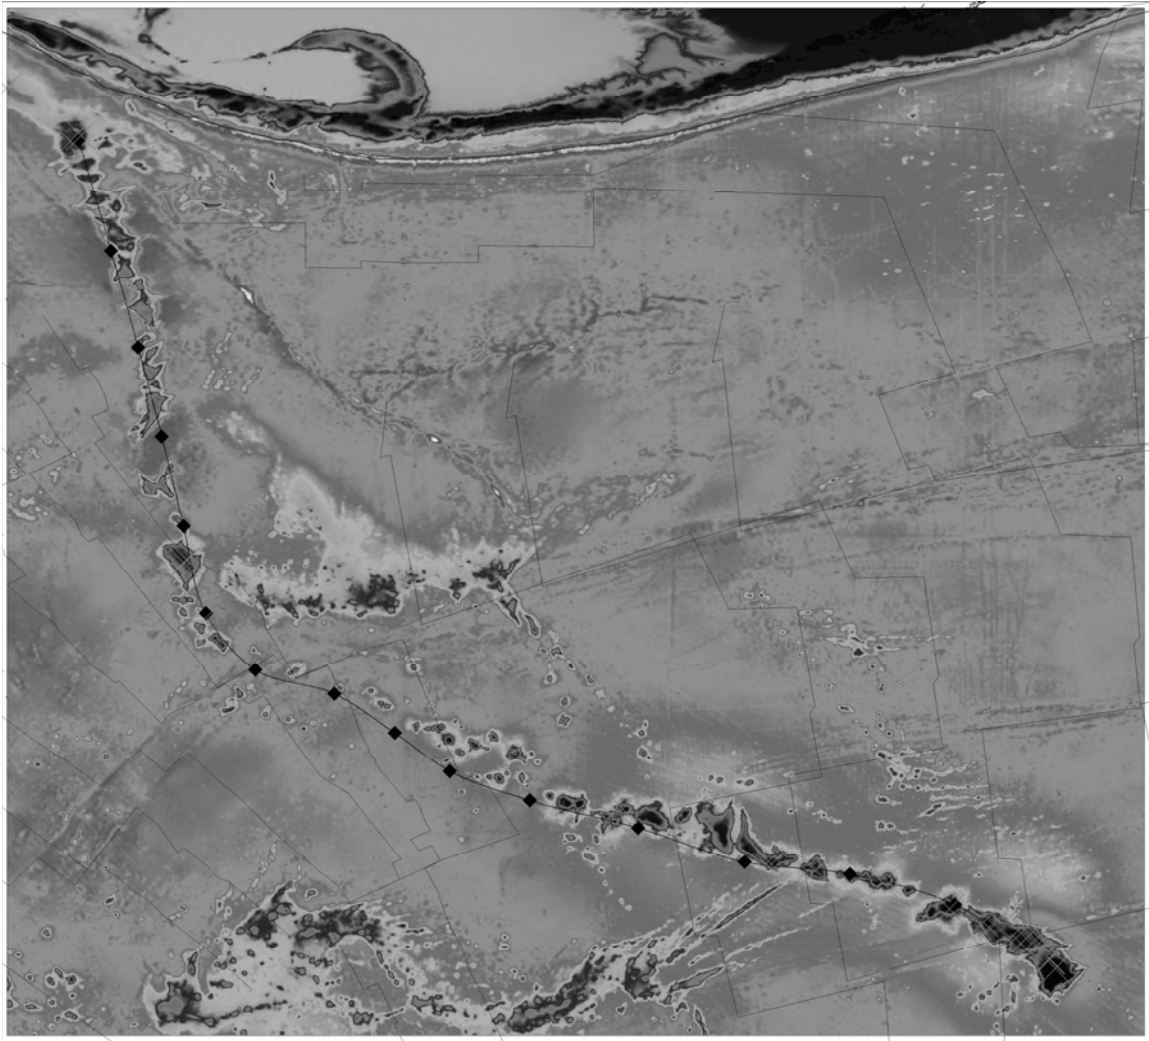

Figure 1. North central Pacific Ocean bathymetry (after Smith and Sandwell, 1999), with predicted locus of Pacific Plate relative to a fixed Hawaiian hotspot, calculated at 5 m.y. interval (after Raymond et al., 2000, corrected). Calculation methods are described in the Appendix (in the data repository).

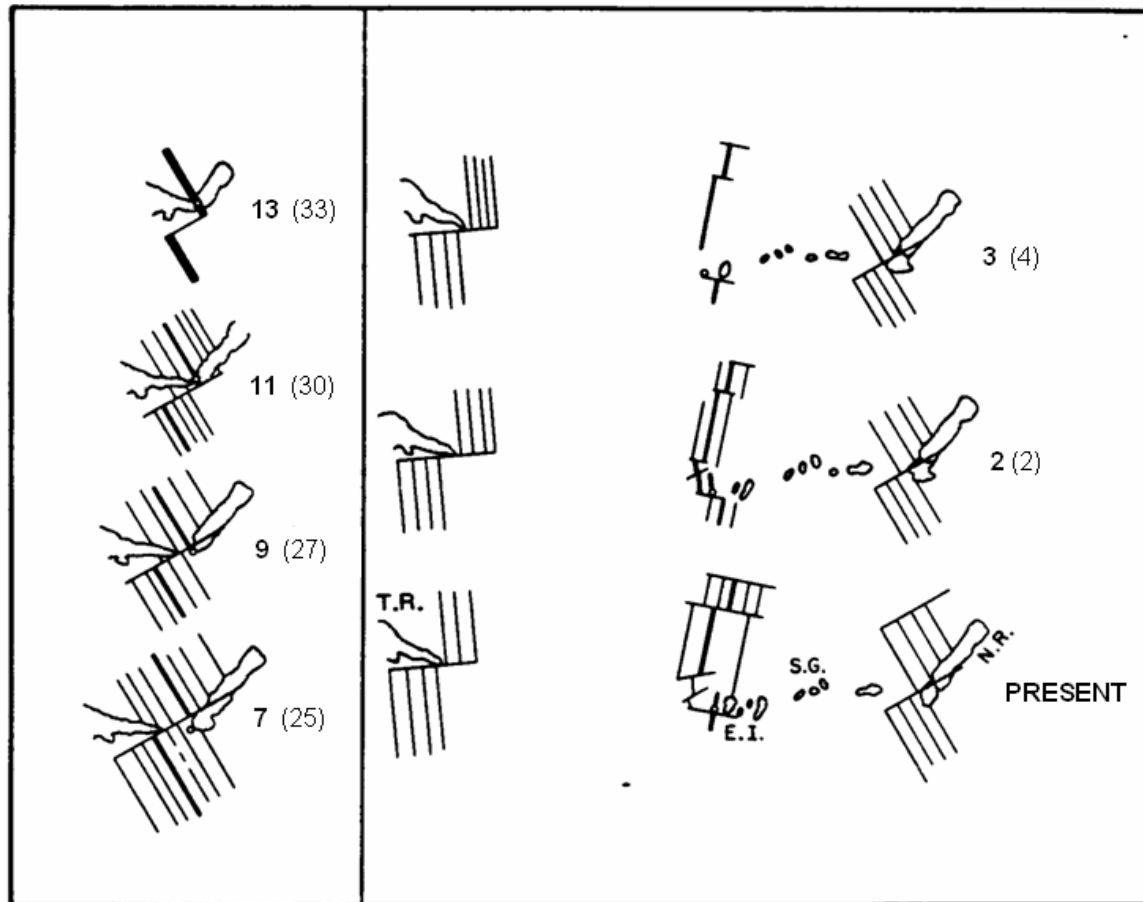

Figure 2. Schematic evolution of east central Pacific Ocean from magnetic isochron 13 to Present, based on plate reconstructions of Pilger and Handschumacher (1981). Note that the isochron-fracture zone reconstructions also result in juxtaposition of Tuamotu and Nazca ridges at the Pacific-Nazca (-Farallon) spreading center until isochron 11 time. This implies generation of the ridges by a melting anomaly beneath the spreading center (from at least isochron 21 to isochron 11 times). It is difficult to see how oblique propagating fractures could produce the “mirror-image” ridges without a sublithospheric melting anomaly.

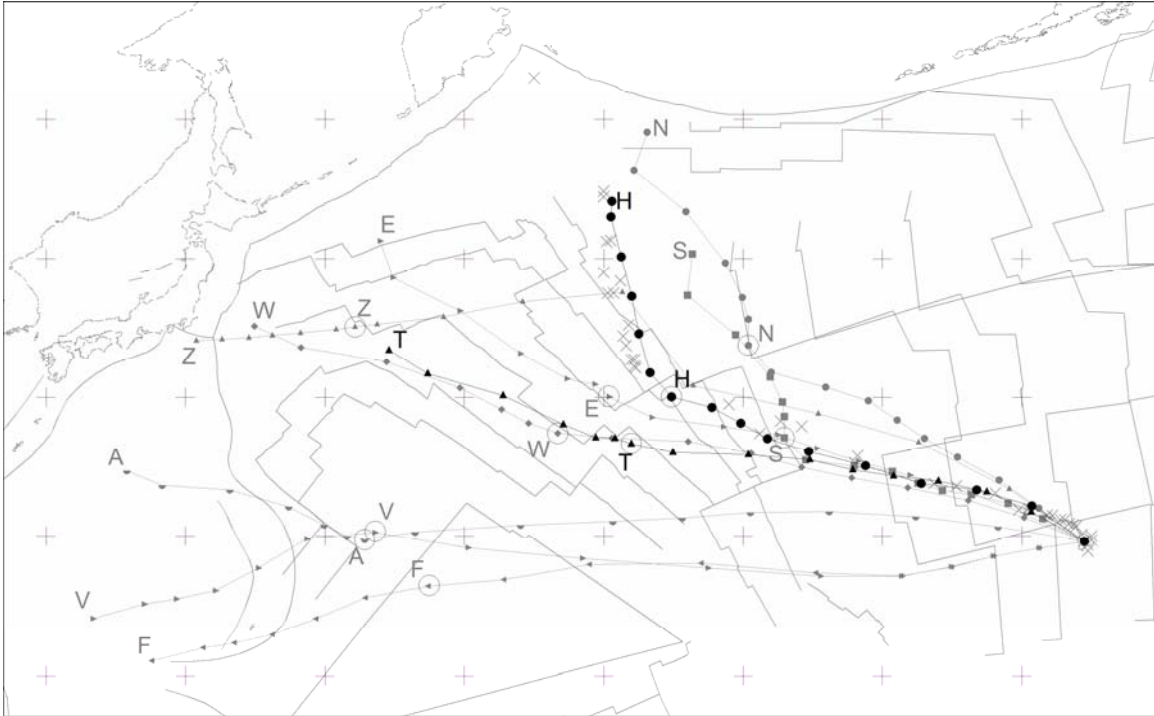

Figure 3. Loci of several plates and Hawaiian and Tristan (Atlantic-Indian Ocean) hotspot frames relative to a fixed Pacific plate – A: Australian, E: Eurasian, H: Hawaiian hotspot (model of Raymond et al., 2000), N: North American, S: South American, T: Tristan hotspot, W: West Antarctic, plus Pacific plate relative to adjacent (fixed) oceanic plates: F: Farallon, V: Vancouver, and Z: Nazca. Reconstructions at 5 m.y. intervals, calculated from Hawaii. Loci are constructed as if each plate or hotspot frame incorporated present day Hawaii and show the hypothetical path of the plate or frame relative to the fixed plate over the past 75 m.y. (Straight-line segments connect each calculated point). Reconstruction parameter sources are in Table 1 and plate circuits in Table 2, both in the repository. Calculation methods and parameters are in Appendices I and II in the data repository. Magnetic isochrons and plate boundaries are from Müller et al. (1997). Note changes in apparent plate motion between 45 and 50 Ma (that is, close to the age of the Hawaiian-Emperor bend), especially within the North and South American loci. Farallon and Vancouver loci also show slight changes. See Fig. 4 for a close-up of the younger portions of some of the critical loci.

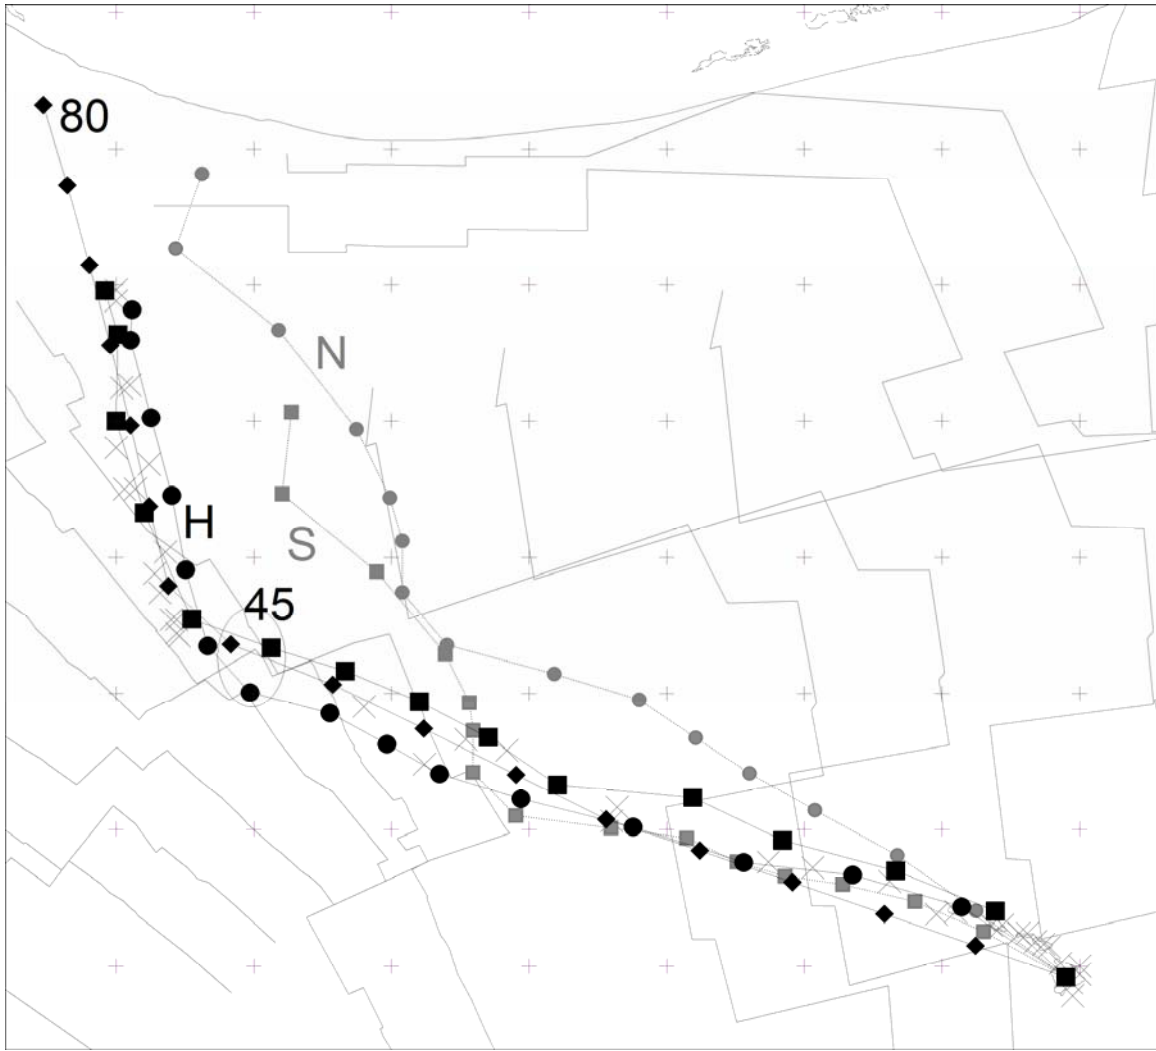

Figure 4. Close-up of Figure 3, for Pacific plate motion relative to North American (NA) and South American (SA) plate and Hawaiian hotspot reference frames (with two more models shown). Reconstructions at 5 m.y. intervals, calculated from Hawaii. For Pacific-Hotspot, Harada and Hamano (2000): circles with fine dotted line; Norton (2000): squares with bold dotted line; Raymond et al. (2000): diamonds with solid line. Pacific-North American and South American: circles with solid lines. Note that the model for Harada and Hamano's parameters extends to only 70 Ma, not 75 Ma. Note subparallelism of North and South American loci with loci for the Hawaiian hotspot, between ~25 and ~75 Ma (see also Norton, 1995), and, especially corresponding "bends" in the loci between 45 and 50 Ma.

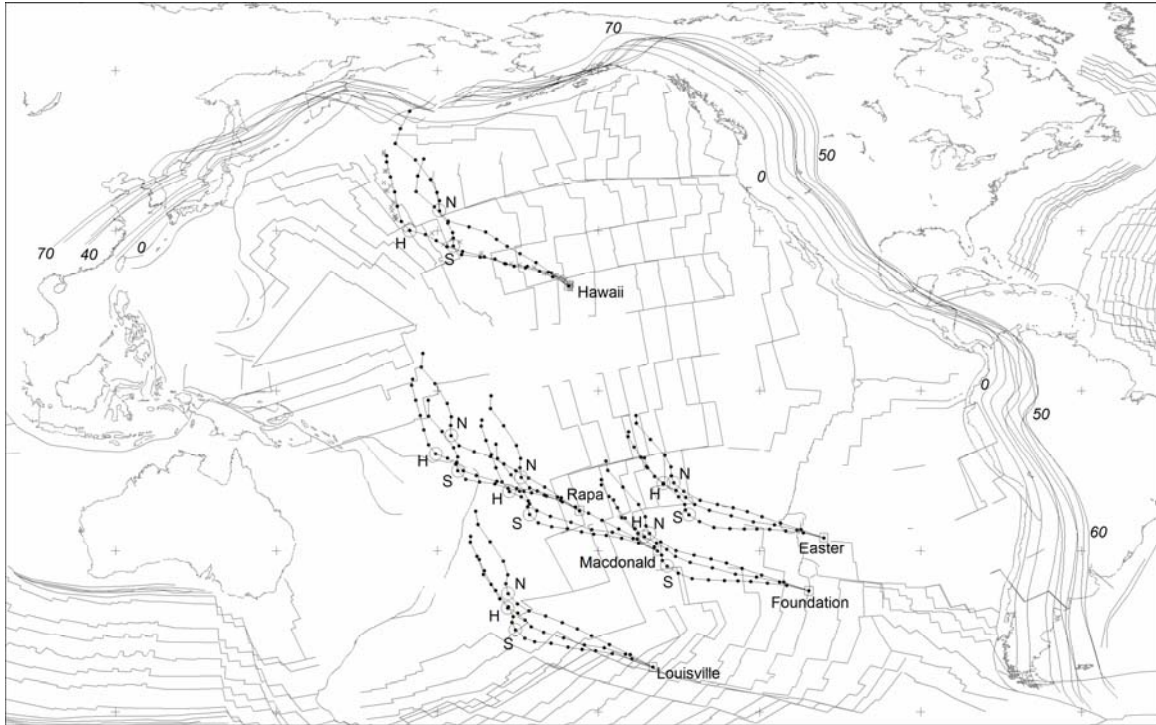

Figure 5. Reconstructed loci of North American (N), South American (S), and Pacific hotspots (H) relative to the Pacific plate, anchored at five postulated hotspots (Hawaii, Easter, McDonald, Rapa, and Louisville). Circled points are 45 Ma. Generalized continental, sublithospheric subduction margin of the circum-Pacific, restored to the Hawaiian hotspot frame; note clustering of restored margins, especially between 75 and 40 Ma. “X” indicates locations of dated samples from various hotspot traces. Magnetic isochrons and plate boundaries from Müller et al. (1997). Reconstruction sources, circuits, and parameters in Tables 1-3 in the data repository.

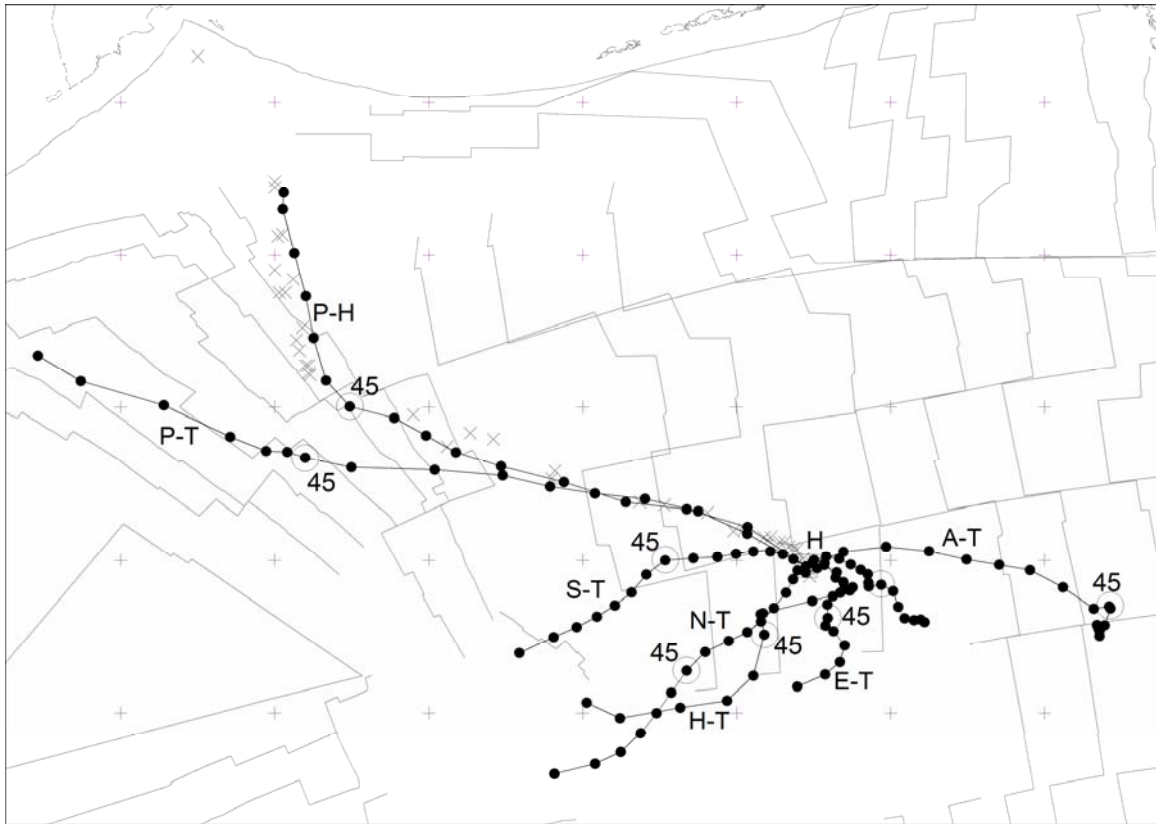

Figure 6. Loci of the several plates and Hawaiian hotspot relative to the Tristan (T) hotspot reference frames: A-T: Australian, E-T: Eurasian, H-T: Hawaiian hotspot, N-T: North American, P-T: Pacific, S-T: South American, W-T: West Antarctic, plus Pacific plate relative to Hawaiian hotspot (P-H). Reconstructions at 5 m.y. intervals, calculated from Hawaii. Loci represent hypothetical motion path of plate or frame relative to Tristan hotspot reference frame. Magnetic isochrons and plate boundaries from Müller et al. (1997). The discrepancy between the Pacific loci relative to the Hawaiian and Tristan hotspot reference frames is a measure of the relative independence of the two reference frames. Note subparallelism of South and North American-Tristan loci with Hawaiian-Tristan locus. This parallelism is the transformed equivalent to that in Pacific plate frame (Fig. 4).

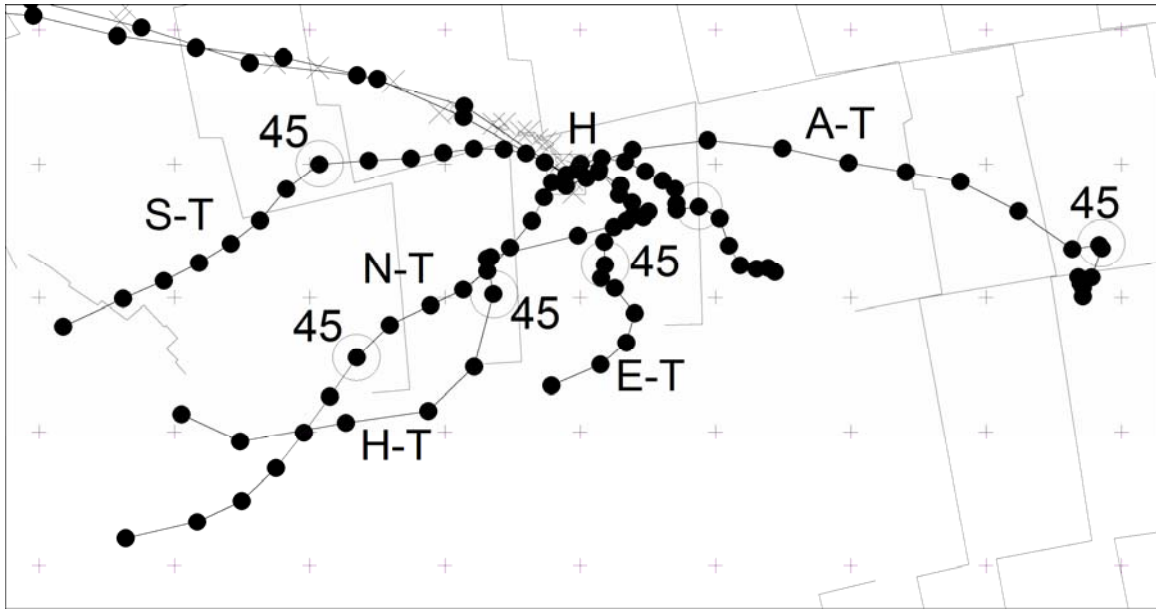

Figure 7. Close-up of Figure 6. Note subparallelism of Hawaiian-Tristan and North American-Tristan loci, between ~30 and 75 Ma.

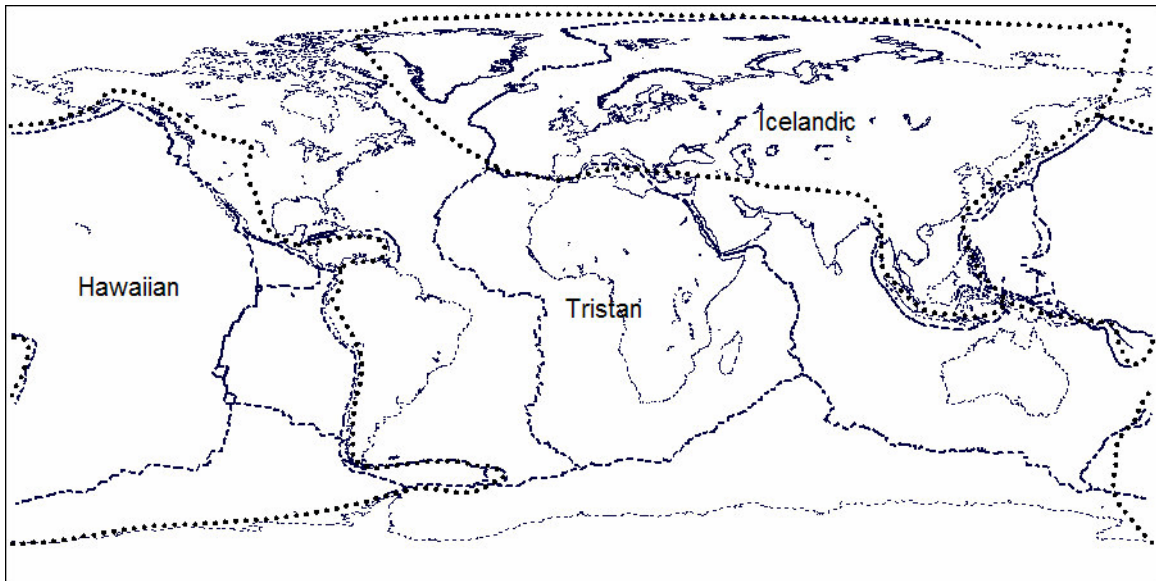

Figure 8. Proposed mesoplate boundaries (dotted polylines) modified from Pilger (2003a, b), to correspond with Liu et al.'s (2003) calculated high-stress boundaries (see also Liu, 2003; and Horowitz et al., 2001) and intraplate stress boundaries in western North America (Pilger, 2003a).

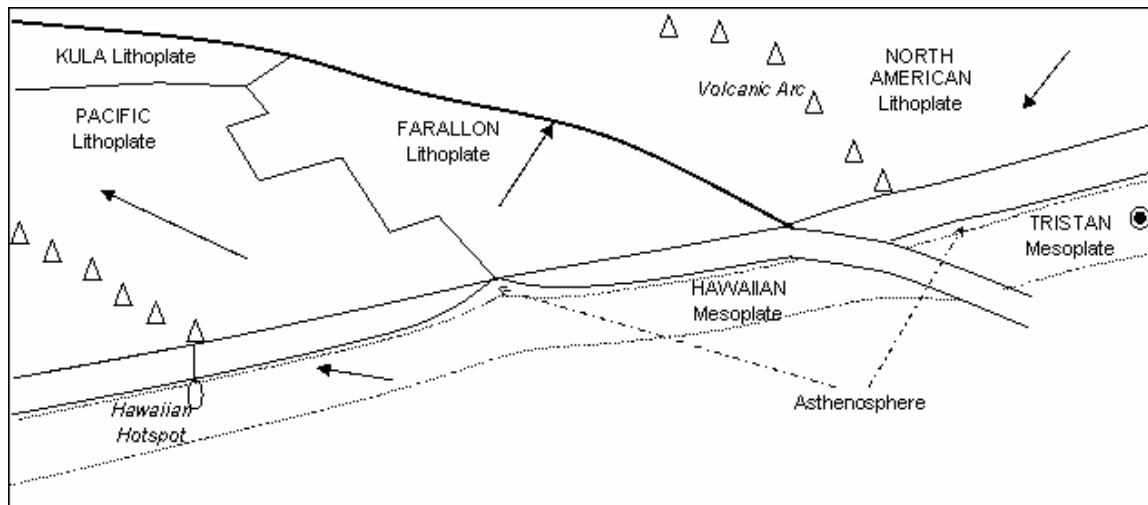

Figure 9. Schematic illustration of interaction of Pacific, Farallon, Kula, and North American lithoplates and Hawaiian and Tristan mesoplates (reference frames) in the early Cenozoic (~60 Ma). For convenience, Tristan mesoplate is fixed. Arrows indicate motion of Hawaiian mesoplate and lithoplates relative to Tristan.



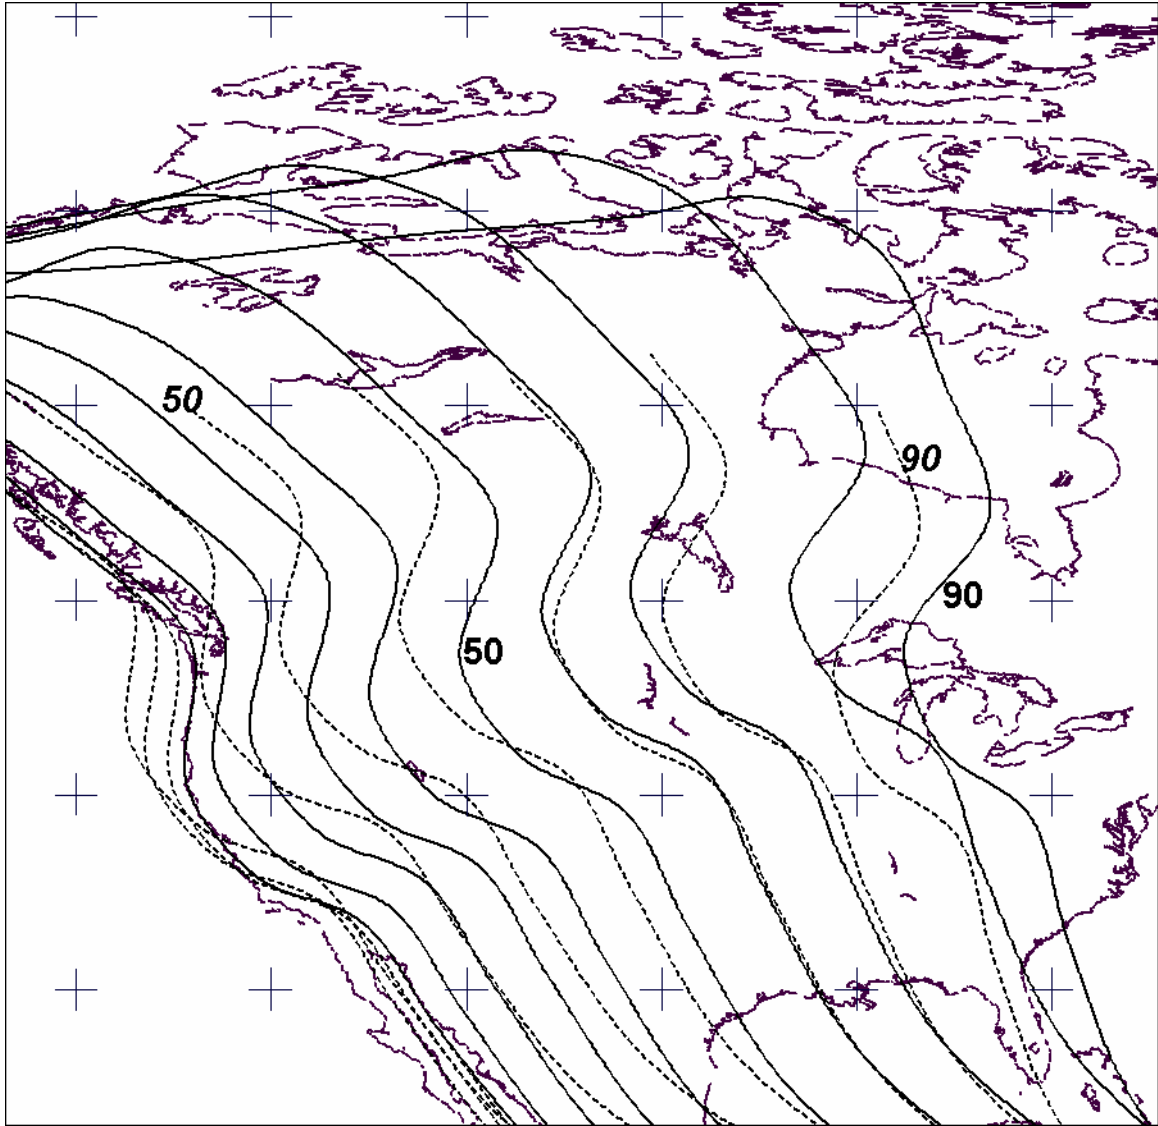

Figure 10. Reconstructions of the western margin of the North America at 10 m.y. intervals. Solid lines: North American lithoplate relative to the Tristan mesoplate (hotspot reference frame). Dashed lines: Hawaiian mesoplate relative to Tristan mesoplate. Note western migration of both reconstructed margins between ~75 and 30 Ma. This implies that relative motion of North America and the Hawaiian mesoplate during this time was minimal.

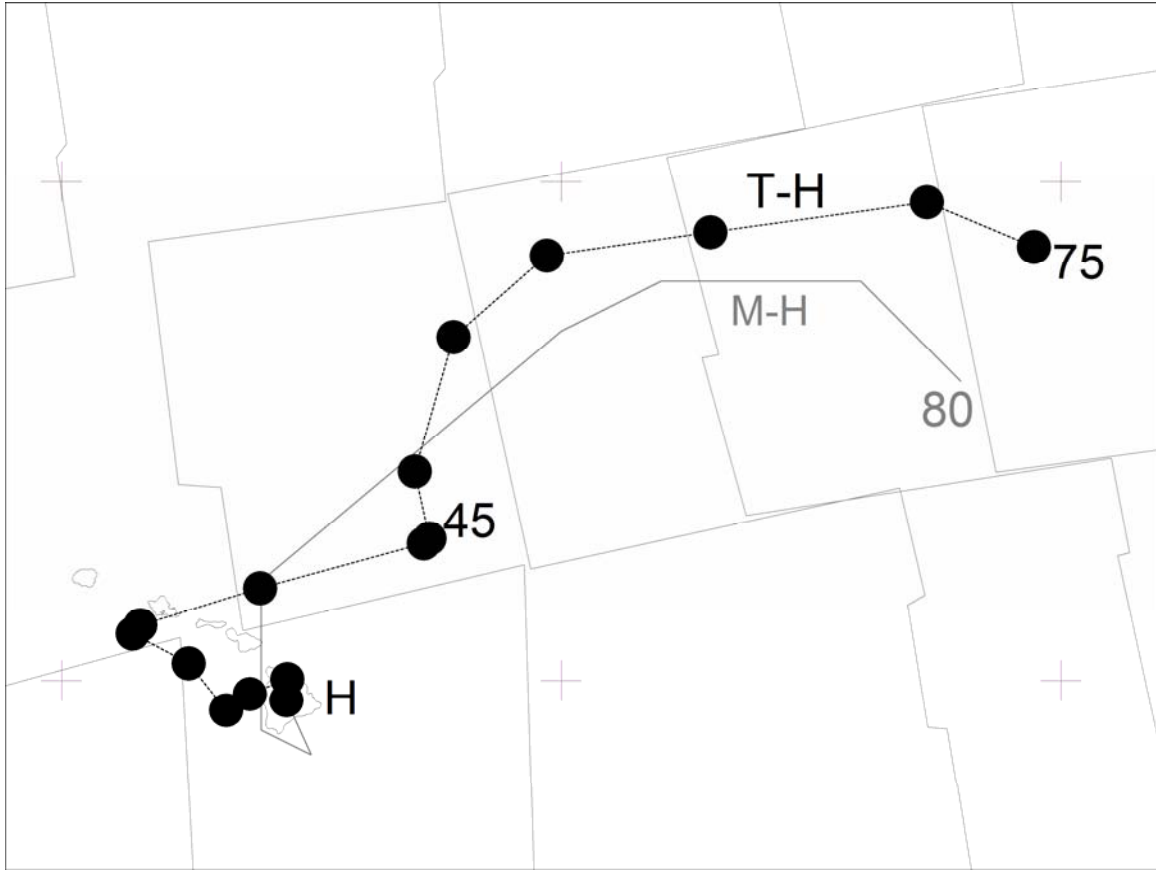

Figure 11. Loci of Hawaiian hotspot (H) relative to Tristan hotspot reference frame (T-H; dashed line and solid circles; this paper) and relative to the mean convective frame of O'Neill et al. (2005) (M-H: solid gray line, after their Fig. 17). Dates of end of loci (75 and 80) and intermediate point (45) in Ma. Latitude and longitude graticules are spaced at 10° intervals. As the published locus of O'Neill et al. (their Fig. 17) is shown in color gradations, precise ages cannot be shown.
